# Supplementary material for: Expected Practice as a Novel Antibiotic Stewardship Intervention
Source: PubMed Central journal article supplement — Open Forum Infect Dis. 2018 Dec 3;6(1):ofy319. doi: 10.1093/ofid/ofy319 (PMC6324551; doi:10.1093/ofid/ofy319), 2018-12-03
Supplement: ofy319_suppl_supplementary_figure.pdf [file ofy319_suppl_supplementary_figure.pdf]

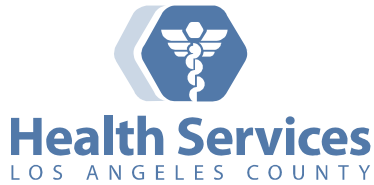

## Expected Practices

Specialty: Infectious Disease and Antibiotic Stewardship Workgroups

Subject: Duration of Antibiotic Therapy for Common Infections

Date: September 14, 2016

---

**Purpose:**

To outline most effective antibiotic duration length of therapy for common infections

**Target Audience:**

All Outpatient and Inpatient Clinicians

**Expected Practice:**

Multiple clinical trials have demonstrated that shorter courses of antibiotics are as effective as longer courses for many common infections. Furthermore, shorter courses expose the body and the environment to less antibiotic selective pressure, decreasing the rate of emergence of resistant bacteria. Based on randomized controlled trials, standard antibiotic durations for infections have been established and are listed below. Clinical judgment is important to ensure that the patient being treated is appropriate for the disease category and population studied, and to monitor for relapse of infection or failure to resolve with initial therapy. Deviations from these durations of antibiotics should be explicitly clinically justified as longer courses have not been established to be more effective for typical cases, and expose the patient to increased risk of adverse events and greater risk of emergence of antibiotic resistance.

This *Expected Practice* was developed by a DHS Specialty-Primary Care Work Group to fulfill the DHS mission to ensure access to high-quality, patient-centered, and cost-effective health care. SPC Work Groups, composed of specialist and primary care provider representatives from across LA County DHS, are guided by 1) real-life practice conditions at our facilities, 2) available clinical evidence, and 3) the principle that we must provide equitable care for the entire population that LA County DHS is responsible for, not just those that appear in front of us. It is recognized that in individual situations a provider's clinical judgment may vary from this *Expected Practice*, but in such cases compelling documentation for the exception should be provided in the medical record.

| <b>Disease<sup>(ref)</sup></b>                                                                                                 | <b>Expected Duration of Antibiotic Therapy (days)</b>                                              | <b>Comment</b>                                                                                                                                                                                                                                                                                                                                                                              |
|--------------------------------------------------------------------------------------------------------------------------------|----------------------------------------------------------------------------------------------------|---------------------------------------------------------------------------------------------------------------------------------------------------------------------------------------------------------------------------------------------------------------------------------------------------------------------------------------------------------------------------------------------|
| Community Acquired Pneumonia <sup>1-3</sup>                                                                                    | 5                                                                                                  | Not studied for ICU/ventilated patients                                                                                                                                                                                                                                                                                                                                                     |
| Nosocomial Pneumonia <sup>4,5</sup>                                                                                            | 7                                                                                                  | Includes ICU/ventilated patients, some advocate for 10-14 days for <i>Pseudomonas</i> or <i>Acinetobacter</i> —no data clarify if longer courses are more effective for these pathogens.                                                                                                                                                                                                    |
| Intra-abdominal Infection <sup>6,7</sup>                                                                                       | 4                                                                                                  | Antimicrobial therapy of established infection should generally be limited to 4 days after source control in patients who are hemodynamically stable. Longer durations of therapy have not been associated with improved outcome in such patients. Patients who are unstable or have difficult to achieve source control should be discussed with ID.                                       |
| Acute bronchitis                                                                                                               | ≠                                                                                                  | Routine antibiotic treatment of acute bronchitis is NOT indicated                                                                                                                                                                                                                                                                                                                           |
| Acute Exacerbation of Chronic Bronchitis and COPD <sup>8</sup>                                                                 | ≤5                                                                                                 | Reserve antibiotics for patients with an acute exacerbation <u>with</u> significant physiological compromise on top of chronic bronchitis (defined as a chronic cough that occurs on most days of the month for ≥3 months per year for ≥2 years) or for COPD for patients with physiological compromise, and worsening sputum purulence and either increased dyspnea or frequency of cough. |
| Acute Bacterial Sinusitis <sup>9</sup>                                                                                         | 5                                                                                                  | 98% of URIs are viral and should NOT be treated with antibiotics—consider Abx for symptoms of acute rhinosinusitis that fail to improve within ≥10 d after onset of URI, or fever 102°F (39°C), or biphasic illness with symptoms/signs of acute rhinosinusitis worsening within 10 d after initial improvement.                                                                            |
| Cellulitis and skin abscesses <sup>10-12</sup>                                                                                 | 5 to 6                                                                                             | In conjunction with drainage of all/any abscess collection.                                                                                                                                                                                                                                                                                                                                 |
| Complicated Urinary Tract Infection (including pyelonephritis or UTI in the presence of indwelling catheters) <sup>13-15</sup> | 5-7<br><br>(3 days may be appropriate for catheter-associated cystitis if urinary catheter removal | Appropriate for patients with anatomical abnormalities or urinary-catheter-related. Source control intervention is first priority. Removal of urinary catheter recommended.                                                                                                                                                                                                                 |

|                                        |                              |                                                                                                                                                                                                                                                                                                                            |
|----------------------------------------|------------------------------|----------------------------------------------------------------------------------------------------------------------------------------------------------------------------------------------------------------------------------------------------------------------------------------------------------------------------|
|                                        | and rapid clinical response) |                                                                                                                                                                                                                                                                                                                            |
| Cystitis <sup>13</sup>                 | 1-5 days                     | 5 days of nitrofurantoin, 3 days of TMP-SMX, 1 dose of fosfomycin, or 1 dose of IV ceftriaxone or an aminoglycoside is sufficient.                                                                                                                                                                                         |
| Asymptomatic Bacteriuria <sup>14</sup> | 0                            | DO NOT TREAT IN THE ABSENCE OF SYMPTOMS UNLESS THE PATIENT IS PREGNANT, IS A RENAL TRANSPLANT PATIENT, OR IS UNDERGOING URINARY PROCEDURAL MANIPULATION.                                                                                                                                                                   |
|                                        |                              | Key Points:                                                                                                                                                                                                                                                                                                                |
|                                        |                              | <ol style="list-style-type: none"> <li>1. Pyuria accompanying asymptomatic bacteriuria is not by itself an indication for antimicrobial treatment.</li> <li>2. A positive urine culture at &gt; 10<sup>5</sup> CFU/mL identifies bacteriuria but is not an indication for treatment in the absence of symptoms.</li> </ol> |

**When to submit eConsult:** Acute infections generally do not warrant eConsults. If there are questions about subacute or chronic infections, or recurrent acute infections, eConsults are appropriate.

#### References:

1. el Moussaoui R, de Borgie CA, van den Broek P, et al. Effectiveness of discontinuing antibiotic treatment after three days versus eight days in mild to moderate-severe community acquired pneumonia: randomised, double blind study. *Bmj*. 2006;332(7554):1355.
2. Dunbar LM, Wunderink RG, Habib MP, et al. High-dose, short-course levofloxacin for community-acquired pneumonia: a new treatment paradigm. *Clin Infect Dis*. 2003;37(6):752-760.
3. Uranga A, Espana PP, Bilbao A, et al. Duration of antibiotic treatment in community-acquired pneumonia: a multicenter randomized clinical trial. *JAMA Internal Medicine*. ePublished.
4. Chastre J, Wolff M, Fagon JY, et al. Comparison of 8 vs 15 days of antibiotic therapy for ventilator-associated pneumonia in adults: a randomized trial. *JAMA : the journal of the American Medical Association*. 2003;290(19):2588-2598.
5. Singh N, Rogers P, Atwood CW, Wagener MM, Yu VL. Short-course empiric antibiotic therapy for patients with pulmonary infiltrates in the intensive care unit. A proposed solution for indiscriminate antibiotic prescription. *Am J Respir Crit Care Med*. 2000;162(2 Pt 1):505-511.
6. Sawyer RG, Claridge JA, Nathens AB, et al. Trial of short-course antimicrobial therapy for intraabdominal infection. *N Engl J Med*. 2015;372(21):1996-2005.
7. Solomkin JS, Mazuski JE, Bradley JS, et al. Diagnosis and management of complicated intra-abdominal infection in adults and children: guidelines by the Surgical Infection Society and the Infectious Diseases Society of America. *Clin Infect Dis*. 2010;50(2):133-164.
8. El Moussaoui R, Roede BM, Speelman P, Bresser P, Prins JM, Bossuyt PM. Short-course antibiotic treatment in acute exacerbations of chronic bronchitis and COPD: a meta-analysis of double-blind studies. *Thorax*. 2008;63(5):415-422.

9. Falagas ME, Karageorgopoulos DE, Grammatikos AP, Matthaïou DK. Effectiveness and safety of short vs. long duration of antibiotic therapy for acute bacterial sinusitis: a meta-analysis of randomized trials. *Br J Clin Pharmacol*. 2009;67(2):161-171.
10. Hepburn MJ, Dooley DP, Skidmore PJ, Ellis MW, Starnes WF, Hasewinkle WC. Comparison of short-course (5 days) and standard (10 days) treatment for uncomplicated cellulitis. *Arch Intern Med*. 2004;164(15):1669-1674.
11. Moran GJ, Fang E, Corey GR, Das AF, De Anda C, Prokocimer P. Tedizolid for 6 days versus linezolid for 10 days for acute bacterial skin and skin-structure infections (ESTABLISH-2): a randomised, double-blind, phase 3, non-inferiority trial. *Lancet Infect Dis*. 2014;14(8):696-705.
12. Prokocimer P, De Anda C, Fang E, Mehra P, Das A. Tedizolid phosphate vs linezolid for treatment of acute bacterial skin and skin structure infections: the ESTABLISH-1 randomized trial. *JAMA : the journal of the American Medical Association*. 2013;309(6):559-569.
13. Gupta K, Hooton TM, Naber KG, et al. International clinical practice guidelines for the treatment of acute uncomplicated cystitis and pyelonephritis in women: A 2010 update by the Infectious Diseases Society of America and the European Society for Microbiology and Infectious Diseases. *Clin Infect Dis*. 2011;52(5):e103-120.
14. Nicolle LE, Bradley S, Colgan R, et al. Infectious Diseases Society of America guidelines for the diagnosis and treatment of asymptomatic bacteriuria in adults. *Clin Infect Dis*. 2005;40(5):643-654.
15. Hooton TM, Bradley SF, Cardenas DD, et al. Diagnosis, prevention, and treatment of catheter-associated urinary tract infection in adults: 2009 International Clinical Practice Guidelines from the Infectious Diseases Society of America. *Clin Infect Dis*. 2010;50(5):625-663.
